# Supplementary material
Source: publisher figshare collection journal article supplement (https://gsajournals.figshare.com/ndownloader/files/14541332)
Supplement: Supplementary file 1 [file 14541332]

## Sheet: cc similarity
Table S2. The heat map shows the results of a pairwise comparison between 216 MiniMUGA samples (rows) and 75 GigaMUGA samples (columns), representing 75 CC strains. Each number in the comparison matrix (cell) is the sum of matching genotype calls per sample pair, limited to a maximum of 3395 CC reliable markers common to both the MiniMUGA and GigaMUGA platforms.
sample_id	CC001_CC001/Unc_M4363_giga	CC002_CC002/Unc_M4575_giga	CC003_CC003/Unc_M4601_giga	CC004_CC004/TauUnc_M4292_giga	CC005_CC005/TauUnc_M4714_giga	CC006_CC006/TauUnc_M4698_giga	CC007_CC007/Unc_M3406_giga	CC008_CC008/GeniUnc_M983_giga	CC009_CC009/Unc_M3045_giga	CC010_CC010/GeniUnc_M3518_giga	CC011_CC011/Unc_M3070_giga	CC012_CC012/GeniUnc_M1359_giga	CC013_CC013/GeniUnc_M1075_giga	CC015_CC015/Unc_M1649_giga	CC016_CC016/GeniUnc_M1077_giga	CC017_CC017/Unc_M1453_giga	CC018_CC018/Unc_M1136_giga	CC019_CC019/TauUnc_M6839_giga	CC020_CC020/GeniUnc(AU8054)M533_giga	CC021_CC021/Unc_M1515_giga	CC022_CC022/GeniUnc_M444_giga	CC023_CC023/GeniUnc_M704_giga	CC024_CC024/GeniUnc_M1060_giga	CC025_CC025/GeniUnc_M1062_giga	CC026_CC026/GeniUnc_M3004_giga	CC027_CC027/GeniUnc_M756_giga	CC028_CC028/GeniUnc_M899_giga	CC029_CC029/Unc_M720_giga	CC030_CC030/GeniUnc_M1011_giga	CC031_CC031/GeniUnc_M411_giga	CC032_CC032/GeniUnc_M1247_giga	CC033_CC033/GeniUnc_M571_giga	CC034_CC034/Unc_M734_giga	CC035_CC035_Uncm1489_giga	CC036_CC036/Unc_M819_giga	CC037_CC037/TauUnc_M955_giga	CC038_CC038/GeniUnc_M806_giga	CC039_CC039/Unc_M3730_giga	CC040_CC040/TauUnc_M4198_giga	CC041_CC041/TauUnc_M5135_giga	CC042_CC042/GeniUnc_M4068_giga	CC043_CC043/GeniUnc_M797_giga	CC044_CC044/Unc_M1328_giga	CC045_CC045/GeniUnc_M817_giga	CC046_CC046/Unc_M1016_giga	CC047_CC047/Unc_M1079_giga	CC049_CC049/TauUnc_M4214_giga	CC050_CC050/Unc_M1820_giga	CC051_CC051/TauUnc_M6059_giga
CC001_GC1730_mini	3301	1831	1717	1735	1983	1877	1831	1850	1738	1771	1930	1900	1912	1856	2025	1952	1988	1898	1851	1913	1805	1706	1894	2067	1733	1984	2083	1927	1724	1865	1835	1891	1861	1874	1750	1916	1728	1798	1728	1960	1866	1893	1762	1926	1882	1773	1770	1929	2053
CC001_JY8107_mini	3310	1830	1708	1733	1974	1879	1824	1845	1732	1773	1931	1912	1912	1855	2015	1947	1983	1893	1845	1914	1818	1707	1880	2063	1725	1978	2087	1931	1711	1867	1832	1875	1858	1874	1746	1914	1728	1792	1734	1962	1852	1882	1757	1920	1887	1771	1766	1923	2049
CC001_QW3204_mini	3302	1827	1711	1725	1976	1864	1827	1843	1732	1762	1929	1893	1905	1851	2021	1945	1982	1882	1834	1897	1793	1702	1878	2043	1728	1972	2077	1925	1712	1867	1825	1889	1842	1871	1756	1903	1717	1791	1715	1944	1859	1874	1755	1913	1873	1775	1771	1930	2053
CC002_HU8860_mini	1843	3242	1854	1832	1751	1870	1793	1707	1756	1833	1808	1799	1838	1835	1885	1917	1721	1799	1891	1932	1904	1826	1933	1883	1895	1807	1803	1845	2002	2023	1872	1812	2071	1826	1763	1800	1804	1917	1793	1945	1823	1858	1836	1835	1808	1937	1865	1799	1922
CC002_PC1858_mini	1821	3263	1835	1818	1745	1865	1784	1705	1743	1804	1811	1790	1836	1830	1886	1900	1706	1777	1864	1929	1888	1838	1922	1872	1886	1800	1803	1834	1982	1982	1865	1798	2059	1794	1764	1790	1798	1897	1784	1950	1794	1854	1818	1821	1802	1920	1860	1792	1917
CC002_WC6775_mini	1821	3232	1827	1820	1747	1872	1801	1711	1746	1804	1824	1814	1836	1822	1908	1904	1713	1781	1887	1905	1865	1844	1943	1870	1911	1807	1830	1862	1990	1998	1874	1803	2069	1784	1762	1797	1816	1928	1794	1954	1807	1858	1794	1830	1788	1904	1888	1786	1926
CC003_MX4255_mini	1731	1851	3301	1678	1693	1839	1780	1981	1833	1698	1855	1867	1830	1919	1895	1718	1797	1875	1885	1890	1900	2061	1812	1878	1917	1802	1860	1737	1983	1745	1799	1803	1790	1808	1728	1875	1921	1722	1867	1848	2038	1757	1764	1683	1843	2150	1826	1853	1882
CC003_VB2956_mini	1730	1852	3303	1680	1692	1836	1781	1982	1833	1697	1855	1866	1827	1917	1896	1720	1800	1876	1884	1891	1899	2064	1811	1877	1917	1801	1862	1739	1981	1746	1797	1800	1788	1806	1728	1874	1924	1722	1867	1851	2040	1756	1761	1681	1840	2152	1825	1852	1882
CC003_ZJ9104_mini	1729	1850	3303	1678	1691	1836	1782	1979	1832	1694	1854	1867	1825	1915	1897	1720	1798	1877	1882	1891	1901	2062	1811	1875	1918	1802	1860	1741	1980	1745	1796	1801	1788	1807	1727	1871	1922	1718	1866	1849	2040	1757	1762	1680	1839	2150	1825	1854	1882
CC004_AD3676_mini	1841	1948	1792	3109	1820	1808	1892	1703	1843	1803	1908	1744	1905	1810	1844	1788	1918	1841	1809	1779	1919	1795	1823	1815	1964	1897	1926	1781	1768	1804	1906	1730	1938	1740	1875	1945	1830	1879	1803	1895	1812	1846	1686	1713	1829	1820	1874	1810	1865
CC004_SW6832_mini	1854	1954	1799	3086	1828	1816	1900	1711	1846	1812	1916	1750	1913	1818	1858	1799	1927	1845	1814	1790	1928	1806	1825	1826	1968	1906	1941	1783	1780	1812	1909	1732	1955	1738	1882	1954	1831	1879	1803	1901	1821	1849	1694	1720	1838	1830	1878	1819	1877
CC004_VG2757_mini	1855	1957	1804	3091	1830	1817	1902	1712	1846	1813	1919	1753	1914	1822	1862	1799	1928	1847	1816	1791	1930	1809	1828	1826	1973	1910	1945	1783	1782	1816	1910	1735	1958	1738	1884	1955	1831	1882	1803	1901	1823	1849	1696	1720	1838	1833	1880	1821	1880
CC005_AH9964_mini	2086	1845	1792	1820	3126	1885	1957	1789	1812	1936	1983	2043	2048	1879	2006	1763	2042	1820	1883	1831	1864	1841	1731	2044	1828	2091	1984	1851	1822	1937	1885	1948	1780	1952	1786	2063	1944	1852	1888	2034	1751	1929	1821	1946	1992	1767	1828	1947	1975
CC005_TG0146_mini	2082	1841	1781	1816	3137	1881	1952	1782	1812	1932	1974	2044	2044	1875	2002	1764	2038	1816	1889	1820	1860	1838	1726	2040	1823	2080	1979	1847	1815	1933	1886	1943	1776	1948	1779	2052	1940	1846	1898	2030	1745	1930	1816	1943	1988	1756	1823	1944	1971
CC005_ZS4947_mini	2097	1851	1797	1828	3111	1896	1968	1799	1810	1942	1992	2043	2059	1882	2008	1762	2053	1831	1889	1835	1866	1842	1737	2050	1834	2095	1989	1857	1824	1938	1884	1949	1787	1954	1797	2067	1946	1852	1879	2036	1758	1929	1822	1957	1993	1772	1828	1954	1981
CC006_CK3450_mini	1925	1959	1903	1775	1832	3175	1911	1859	1797	1862	1983	1836	1956	1898	1928	1750	1802	1937	1990	1871	1957	1799	1946	1923	1984	2049	1863	1899	1758	1982	1891	1842	1985	1780	1846	2051	1903	1867	1854	1976	1831	1843	1854	1689	1819	1894	1962	1816	2052
CC006_JU5970_mini	1921	1983	1901	1770	1837	3148	1921	1866	1791	1859	1992	1849	1961	1889	1933	1755	1809	1956	1988	1873	1957	1802	1960	1936	1999	2039	1866	1915	1755	1997	1896	1848	1993	1792	1864	2054	1903	1888	1861	1988	1828	1870	1849	1703	1828	1902	1965	1824	2060
CC006_UT2815_mini	1936	1963	1871	1768	1844	3174	1911	1850	1779	1844	1988	1833	1944	1882	1927	1730	1794	1938	1962	1847	1950	1785	1938	1910	1982	2047	1878	1876	1730	1961	1892	1842	1985	1783	1835	2034	1881	1848	1838	1967	1802	1845	1861	1711	1801	1875	1963	1829	2064
CC007_AJ9333_mini	1884	1848	1815	1802	1894	1880	3233	1887	1863	1796	2004	1911	1896	1816	2051	1846	1845	2051	1875	1779	1902	1865	1846	1897	1913	1928	1952	1923	1834	1812	1900	1830	1894	1754	1962	1787	1885	1872	1930	1831	1849	1950	1663	1822	1892	1856	1859	1950	1912
CC007_EX6525_mini	1884	1878	1833	1804	1885	1903	3184	1895	1902	1807	2027	1927	1932	1809	2076	1857	1847	2056	1885	1786	1932	1874	1866	1891	1925	1951	1954	1929	1842	1842	1886	1844	1905	1766	1971	1803	1917	1887	1958	1869	1854	1967	1696	1832	1907	1888	1866	1993	1942
CC007_QP6923_mini	1883	1877	1833	1803	1877	1901	3193	1893	1902	1798	2021	1921	1921	1803	2073	1853	1838	2069	1873	1783	1928	1876	1870	1895	1919	1956	1955	1924	1841	1833	1883	1851	1912	1768	1976	1807	1916	1890	1956	1858	1852	1959	1694	1830	1894	1881	1862	1994	1932
CC008_DP3758_mini	1881	1743	1996	1596	1705	1819	1875	3279	1847	1769	2045	1726	1906	1868	1904	1835	1925	1768	1950	1941	1841	1938	1774	1831	1890	1961	1958	1762	1842	1833	1830	1843	1669	1809	1840	1862	1933	1647	1797	1877	1960	1853	1677	1728	1819	1931	1860	1951	1808
CC008_PD4092_mini	1882	1743	2000	1599	1706	1822	1876	3279	1849	1769	2047	1729	1907	1869	1905	1835	1929	1772	1952	1944	1844	1942	1775	1834	1894	1959	1961	1766	1844	1834	1832	1843	1673	1810	1838	1866	1936	1651	1798	1876	1963	1854	1680	1728	1820	1934	1860	1953	1807
CC008_SH2098_mini	1881	1743	1996	1596	1706	1819	1877	3279	1847	1770	2045	1724	1904	1866	1902	1835	1927	1768	1951	1943	1843	1938	1773	1829	1890	1961	1958	1764	1840	1835	1832	1841	1671	1810	1840	1864	1934	1646	1799	1876	1960	1853	1675	1727	1819	1931	1860	1953	1808
CC009_BW6012_mini	1775	1770	1865	1752	1754	1732	1859	1868	3237	1896	1777	1790	1823	1699	1895	1885	1875	1862	1793	1888	1947	1866	1934	1851	1816	1801	1799	1810	1825	1838	1752	1759	1747	1807	1864	1826	1933	1865	1810	1787	1881	1897	1940	1721	1836	1925	1782	1863	1937
CC009_IH5656_mini	1773	1781	1862	1750	1752	1738	1866	1870	3231	1900	1780	1790	1830	1699	1886	1885	1875	1863	1801	1895	1946	1855	1933	1851	1823	1809	1800	1810	1825	1846	1755	1761	1749	1808	1873	1829	1934	1863	1812	1790	1881	1905	1944	1725	1835	1922	1788	1852	1938
CC009_YX1930_mini	1781	1782	1866	1753	1747	1736	1858	1865	3237	1901	1781	1794	1827	1701	1896	1886	1880	1867	1801	1897	1943	1870	1933	1848	1824	1809	1807	1815	1834	1845	1756	1766	1757	1811	1870	1831	1938	1864	1815	1793	1888	1903	1946	1721	1839	1930	1774	1856	1941
CC010_BV0053_mini	1830	1864	1742	1733	1890	1842	1818	1810	1918	3216	1791	1961	2052	1872	1871	1938	1976	1874	1894	2014	1960	1774	1920	2025	1845	1853	1870	1841	1840	2006	1927	1806	1955	1837	1852	2059	1841	1902	1785	1946	1864	1902	1816	1782	1852	1855	1891	1858	2028
CC010_LB6692_mini	1836	1863	1746	1733	1899	1845	1819	1814	1928	3214	1795	1971	2056	1880	1872	1941	1984	1877	1892	2021	1967	1778	1918	2026	1850	1855	1872	1848	1838	2008	1932	1812	1958	1848	1855	2062	1846	1908	1786	1951	1861	1902	1814	1787	1861	1852	1897	1863	2033
CC010_MP3584_mini	1828	1862	1748	1732	1898	1849	1826	1818	1924	3207	1796	1956	2052	1867	1878	1946	1983	1871	1889	2006	1959	1772	1919	2023	1843	1860	1866	1845	1848	2014	1922	1805	1953	1833	1859	2067	1848	1904	1782	1944	1873	1908	1823	1776	1860	1866	1888	1866	2034
CC011_QA4913_mini	1987	1861	1887	1832	1917	1953	2004	2065	1783	1767	3192	1858	1983	1761	2020	1731	1961	1880	1860	1866	1792	1780	1933	1839	1914	1926	1926	1898	1742	1848	1919	1879	1787	1899	1994	1811	1960	1812	1829	1975	1952	1934	1742	1817	1888	1809	1869	1877	1936
CC011_QU9163_mini	1994	1867	1893	1841	1915	1959	2012	2076	1790	1769	3200	1864	1991	1767	2026	1744	1964	1888	1868	1874	1798	1787	1942	1844	1919	1930	1933	1907	1749	1853	1929	1887	1795	1904	1999	1822	1968	1816	1837	1979	1961	1940	1755	1824	1899	1819	1865	1886	1941
CC011_UW9915_mini	1999	1871	1902	1846	1922	1969	2020	2086	1798	1776	3208	1865	1997	1774	2032	1745	1970	1894	1876	1878	1804	1791	1946	1850	1926	1935	1939	1908	1758	1859	1936	1896	1803	1907	2007	1828	1973	1821	1844	1984	1964	1945	1761	1832	1900	1824	1865	1888	1949
CC012_QB1738_mini	1944	1837	1904	1677	1989	1813	1907	1744	1794	1935	1863	3220	1945	1750	1929	1963	1943	1962	1753	1993	1969	2021	2014	2008	1860	1906	2097	2004	1937	1907	1931	1884	1971	1884	1797	1995	1915	1852	1761	2011	1838	1910	1752	1875	1962	1861	1890	1898	1983
CC012_QL8587_mini	1938	1824	1883	1666	1982	1802	1914	1752	1788	1933	1865	3199	1952	1755	1922	1965	1939	1947	1755	1989	1963	2013	2024	2000	1851	1886	2090	1988	1928	1899	1926	1874	1954	1878	1797	1991	1910	1852	1763	2017	1842	1908	1751	1879	1963	1863	1882	1887	1979
CC012_YD0089_mini	1948	1857	1909	1689	2001	1817	1921	1763	1803	1946	1878	3220	1961	1767	1940	1984	1958	1979	1770	1999	1980	2035	2039	2023	1866	1918	2107	1998	1941	1920	1941	1896	1980	1894	1808	2006	1930	1866	1765	2027	1853	1918	1761	1892	1972	1874	1903	1911	1993
CC013_DK7353_mini	1952	1875	1863	1825	1968	1922	1882	1914	1828	2034	1980	1947	3263	1962	2133	1893	1994	2037	1857	2073	1800	1728	1855	1971	1874	1889	1915	1952	1988	1931	1856	2019	1981	1985	1811	2053	1902	1844	1974	2087	2026	1953	1769	1904	1922	1702	1960	1787	1991
CC013_HQ5081_mini	1952	1875	1863	1825	1968	1922	1882	1914	1828	2034	1980	1947	3263	1962	2133	1893	1994	2037	1857	2073	1800	1728	1855	1971	1874	1889	1915	1952	1988	1931	1856	2019	1981	1985	1811	2053	1902	1844	1974	2087	2026	1953	1769	1904	1922	1702	1960	1787	1991
CC013_YY2952_mini	1952	1875	1863	1825	1968	1922	1882	1914	1828	2034	1980	1947	3263	1962	2133	1893	1994	2037	1857	2073	1800	1728	1855	1971	1874	1889	1915	1952	1988	1931	1856	2019	1981	1985	1811	2053	1902	1844	1974	2087	2026	1953	1769	1904	1922	1702	1960	1787	1991
CC015_EG7729_mini	1921	1901	1976	1748	1840	1904	1827	1889	1733	1880	1775	1761	1995	3220	1986	1800	1919	1882	1974	1901	1962	1841	1871	1993	1826	1912	1945	1820	2060	1940	1788	1978	1799	1858	1803	1954	1732	1778	1796	1977	1946	1829	1810	1901	1861	1909	1922	1948	1859
CC015_FI8870_mini	1915	1898	1960	1747	1833	1899	1826	1880	1725	1869	1768	1752	1986	3225	1980	1789	1910	1874	1967	1891	1953	1837	1867	1984	1824	1906	1938	1816	2053	1935	1790	1971	1796	1851	1793	1949	1726	1775	1796	1966	1936	1820	1799	1891	1856	1898	1915	1936	1854
CC015_YC4758_mini	1925	1915	1978	1749	1842	1919	1840	1901	1732	1882	1781	1765	2002	3205	1995	1811	1919	1890	1981	1910	1961	1850	1874	1995	1834	1924	1951	1831	2066	1948	1795	1994	1804	1868	1806	1959	1740	1784	1811	1978	1954	1832	1822	1905	1868	1921	1926	1954	1862
CC016_DY0131_mini	2039	1903	1894	1743	1886	1866	2020	1870	1857	1824	1973	1891	2101	1922	3324	1829	1896	1978	1878	1991	1903	1919	2031	2046	1998	2061	2091	2002	1898	2015	1846	2109	1888	2040	1875	1975	1880	2082	1732	2018	2028	1855	1840	1942	1981	1909	1975	1860	2048
CC016_HZ0989_mini	2042	1904	1895	1744	1887	1868	2019	1871	1862	1824	1973	1890	2105	1925	3322	1828	1900	1982	1877	1996	1902	1920	2034	2046	1997	2060	2092	2002	1900	2017	1846	2108	1890	2040	1876	1979	1882	2084	1731	2020	2031	1858	1842	1944	1983	1913	1979	1861	2048
CC016_NL1878_mini	2039	1902	1893	1742	1886	1866	2019	1870	1857	1824	1972	1890	2101	1922	3324	1828	1896	1978	1877	1991	1902	1918	2030	2045	1997	2060	2090	2001	1897	2015	1845	2108	1887	2040	1874	1975	1879	2081	1732	2018	2028	1855	1840	1941	1980	1909	1975	1860	2047
CC017_AZ5054_mini	1945	1913	1722	1683	1679	1681	1806	1816	1848	1879	1702	1923	1856	1735	1824	3336	1812	1833	1859	1745	1841	1827	1821	1830	1793	1863	1885	1856	1904	1799	1869	1701	1748	1825	1725	1860	1715	1815	1696	1773	1887	1827	1729	1801	1749	1861	1666	1895	1846
CC017_RH1628_mini	1955	1921	1721	1692	1690	1689	1807	1828	1859	1886	1716	1931	1865	1739	1831	3317	1819	1840	1862	1761	1849	1838	1829	1829	1802	1874	1892	1867	1910	1806	1880	1709	1758	1836	1734	1869	1727	1823	1703	1780	1892	1833	1735	1810	1759	1863	1675	1905	1854
CC017_SV1606_mini	1950	1914	1716	1688	1683	1681	1806	1823	1852	1879	1710	1926	1859	1730	1825	3330	1814	1835	1858	1753	1840	1830	1825	1820	1794	1869	1883	1861	1904	1799	1875	1704	1751	1830	1729	1862	1720	1815	1698	1775	1886	1827	1730	1800	1751	1855	1668	1898	1848
CC018_EV2611_mini	1993	1726	1794	1796	1948	1737	1796	1914	1858	1932	1916	1907	1951	1847	1899	1814	3288	1832	1829	1894	1654	1826	1823	1991	1719	1967	1936	1757	1759	1938	1626	1764	1812	1886	1760	1926	1837	1709	1821	1991	1887	1900	1665	1841	1814	1855	1877	1844	1870
CC018_SW4175_mini	1998	1729	1803	1796	1944	1739	1796	1914	1855	1927	1916	1908	1954	1853	1899	1812	3284	1848	1828	1896	1654	1837	1822	1988	1720	1969	1954	1766	1761	1936	1624	1758	1817	1882	1758	1932	1843	1711	1827	1994	1886	1898	1662	1847	1820	1855	1876	1852	1875
CC018_YV3153_mini	1997	1727	1797	1799	1950	1739	1806	1917	1861	1932	1917	1909	1951	1846	1902	1816	3285	1837	1831	1889	1655	1831	1819	1990	1722	1973	1944	1761	1761	1938	1627	1761	1816	1882	1763	1927	1840	1711	1829	1994	1885	1901	1665	1846	1822	1854	1883	1846	1872
CC019_IU6333_mini	1916	1826	1869	1733	1733	1901	2013	1735	1829	1826	1866	1920	1992	1832	2001	1850	1848	3264	1823	1874	1989	1825	1984	1923	1948	1943	1869	1970	1774	1822	1923	1905	2029	1881	1879	1855	1826	1726	1880	1863	1838	1860	1685	1823	1742	1757	1870	1944	2098
CC019_LZ4314_mini	1919	1823	1883	1741	1734	1913	2002	1751	1834	1832	1868	1929	1998	1838	2017	1843	1851	3262	1816	1889	1996	1830	1990	1933	1952	1956	1888	1968	1774	1821	1937	1915	2032	1891	1882	1869	1834	1729	1883	1862	1845	1871	1689	1828	1751	1760	1872	1957	2094
CC019_SP9431_mini	1925	1828	1881	1755	1742	1918	2008	1754	1837	1840	1874	1934	2004	1849	2019	1847	1857	3253	1831	1896	2002	1833	1992	1931	1963	1963	1890	1971	1780	1829	1940	1923	2035	1890	1888	1872	1838	1734	1885	1867	1853	1877	1694	1829	1755	1770	1878	1961	2100
CC020_DU0739_mini	1857	1883	1868	1702	1777	1932	1850	1923	1773	1846	1825	1717	1833	1929	1889	1858	1829	1800	3287	1672	1848	1939	1875	1889	1868	1916	1854	1787	1741	1964	1887	1830	1945	1954	1821	1939	1919	1758	1812	1935	1914	1891	1779	1788	1765	1957	1913	1857	2021
CC020_GB3378_mini	1857	1882	1876	1701	1778	1931	1844	1926	1765	1847	1828	1720	1829	1931	1886	1859	1828	1808	3300	1676	1858	1934	1870	1892	1864	1926	1843	1788	1740	1958	1889	1829	1946	1950	1824	1941	1920	1756	1807	1932	1911	1891	1783	1795	1770	1967	1911	1863	2018
CC020_RX6257_mini	1851	1880	1870	1700	1770	1928	1839	1925	1767	1840	1823	1712	1830	1929	1887	1860	1825	1806	3285	1681	1863	1931	1866	1885	1858	1921	1841	1779	1742	1951	1889	1826	1942	1950	1818	1940	1914	1749	1803	1931	1908	1889	1784	1788	1771	1960	1909	1860	2016
CC021_FN8256_mini	1898	1905	1876	1659	1710	1790	1731	1897	1836	1937	1822	1933	2017	1819	1974	1725	1874	1849	1662	3315	1935	1809	1838	1838	1719	1796	1906	1869	1932	1893	1914	1809	1878	1793	1758	1906	1849	1845	1714	1948	1916	1896	1866	1841	2013	1873	1915	1788	1931
CC021_FR3266_mini	1900	1913	1879	1659	1687	1777	1719	1895	1828	1923	1816	1916	2001	1810	1954	1718	1853	1847	1669	3302	1925	1805	1822	1839	1714	1779	1888	1851	1910	1896	1907	1790	1869	1785	1744	1885	1841	1832	1708	1926	1916	1879	1859	1838	1997	1870	1905	1770	1910
CC021_RN6306_mini	1889	1901	1876	1655	1698	1788	1730	1897	1820	1924	1822	1920	2009	1821	1963	1710	1861	1851	1655	3298	1928	1797	1825	1831	1720	1782	1891	1856	1915	1887	1906	1791	1870	1780	1753	1892	1845	1825	1717	1936	1914	1888	1854	1843	1999	1860	1907	1783	1916
CC022_TV7266_mini	1808	1889	1886	1804	1760	1899	1862	1814	1891	1901	1760	1923	1763	1896	1899	1838	1642	1979	1832	1951	3305	1995	1867	1931	1983	1989	1864	1843	1968	1870	1883	1854	1934	1794	1866	1927	1941	1891	1751	1879	1892	1844	1933	1819	1969	1971	1884	1843	1977
CC022_YK3158_mini	1804	1881	1884	1794	1753	1888	1853	1810	1887	1896	1755	1915	1760	1890	1891	1829	1633	1970	1829	1942	3307	1982	1863	1925	1973	1993	1868	1853	1963	1857	1869	1841	1920	1781	1857	1913	1938	1875	1737	1871	1896	1834	1925	1804	1955	1954	1877	1828	1970
CC022_ZD2031_mini	1806	1888	1885	1805	1759	1900	1862	1812	1889	1899	1760	1922	1762	1893	1898	1839	1641	1979	1833	1950	3303	1993	1867	1930	1983	1991	1865	1842	1968	1867	1883	1854	1936	1793	1866	1926	1941	1890	1751	1879	1891	1844	1932	1818	1967	1969	1884	1842	1976
CC023_DB6779_mini	1685	1810	1993	1665	1693	1690	1775	1885	1796	1656	1708	1919	1666	1754	1881	1796	1777	1774	1867	1802	1938	3270	1733	1840	1896	1721	1816	1652	1697	1775	1725	1869	1724	1787	1808	1795	1823	1779	1850	1860	1869	1725	1613	1822	1849	2059	1878	1803	1842
CC023_KC3778_mini	1700	1806	2008	1682	1730	1730	1813	1905	1802	1662	1741	1961	1693	1784	1913	1802	1796	1799	1878	1830	1973	3260	1777	1869	1920	1756	1845	1685	1726	1793	1752	1889	1756	1788	1855	1822	1859	1815	1881	1900	1886	1761	1636	1858	1880	2068	1924	1841	1881
CC023_ZL5830_mini	1687	1817	2006	1672	1715	1719	1798	1893	1804	1665	1721	1951	1680	1776	1906	1795	1794	1806	1874	1831	1959	3252	1761	1858	1911	1738	1828	1673	1717	1798	1739	1884	1755	1796	1845	1806	1849	1816	1867	1885	1878	1744	1639	1850	1858	2060	1914	1818	1862
CC024_HP5963_mini	1887	1942	1812	1719	1642	1881	1809	1763	1894	1857	1903	1982	1826	1807	2026	1823	1797	1969	1859	1857	1875	1774	3325	1925	2026	1832	2027	1933	1852	1892	1967	1970	1955	1854	1945	1944	1868	1960	1825	1935	1848	1839	1828	1947	1830	1931	1867	1966	2133
CC024_RE2910_mini	1890	1938	1811	1717	1642	1879	1812	1766	1898	1855	1903	1982	1826	1807	2022	1823	1794	1968	1854	1857	1875	1774	3314	1925	2024	1830	2029	1932	1849	1891	1970	1973	1954	1848	1948	1942	1867	1962	1824	1937	1848	1834	1825	1947	1827	1931	1865	1968	2135
CC024_SK5154_mini	1891	1941	1814	1717	1645	1882	1812	1769	1897	1857	1902	1982	1826	1811	2023	1823	1798	1967	1857	1853	1874	1776	3314	1926	2027	1832	2032	1935	1853	1890	1968	1975	1953	1848	1943	1945	1868	1958	1823	1938	1842	1837	1828	1948	1831	1932	1870	1969	2136
CC025_CN5661_mini	2046	1869	1874	1691	1922	1840	1839	1808	1810	1951	1794	1962	1925	1903	2025	1821	1973	1897	1873	1849	1928	1889	1909	3307	1865	1853	2006	1997	1820	1933	1809	1818	1938	1945	1882	1920	1912	1962	1793	1959	1889	1892	1836	1831	1918	1878	1793	1978	1888
CC025_LT0230_mini	2048	1871	1881	1691	1934	1845	1845	1813	1812	1964	1797	1973	1935	1902	2033	1822	1977	1905	1884	1856	1927	1894	1920	3315	1866	1859	2018	2001	1833	1948	1825	1826	1943	1951	1889	1924	1925	1976	1804	1963	1894	1901	1845	1842	1926	1884	1796	1988	1904
CC025_YM6343_mini	2045	1872	1875	1686	1930	1845	1844	1811	1808	1962	1794	1968	1930	1895	2028	1824	1975	1902	1881	1853	1926	1891	1916	3312	1865	1857	2012	1999	1826	1942	1818	1822	1941	1946	1884	1923	1919	1971	1796	1960	1894	1893	1842	1835	1924	1884	1795	1986	1895
CC026_CN5292_mini	1737	1897	1914	1845	1723	1907	1869	1883	1783	1794	1874	1825	1837	1774	1994	1789	1726	1944	1851	1736	1973	1922	2024	1872	3323	1840	2010	1925	1705	1851	1934	1864	1843	1856	2021	1932	1831	1962	1878	1891	1907	1872	1727	1769	1934	1902	2057	1869	1902
CC026_LB3959_mini	1737	1897	1914	1845	1723	1907	1869	1883	1783	1794	1874	1825	1837	1774	1994	1789	1726	1944	1851	1736	1973	1922	2024	1872	3323	1840	2010	1925	1705	1851	1934	1864	1843	1856	2021	1932	1831	1962	1878	1891	1907	1872	1727	1769	1934	1902	2057	1869	1902
CC026_RS4644_mini	1739	1899	1914	1845	1723	1907	1869	1884	1783	1796	1874	1827	1839	1774	1994	1791	1726	1944	1851	1736	1975	1924	2024	1872	3323	1840	2010	1926	1705	1851	1936	1864	1845	1858	2021	1932	1831	1962	1878	1893	1909	1872	1727	1771	1934	1902	2057	1869	1904
CC027_AQ4823_mini	2008	1840	1816	1831	1998	2009	1925	1963	1799	1831	1907	1867	1881	1877	2074	1883	2006	1948	1946	1847	2023	1786	1845	1893	1878	3252	1943	1799	1876	1960	1868	1934	1895	1823	1866	2084	1798	1763	1747	1943	1757	1851	1761	1791	1894	1895	1915	2046	1944
CC027_II9604_mini	1990	1831	1810	1826	1988	1996	1911	1962	1788	1826	1901	1858	1875	1871	2070	1882	1984	1953	1931	1847	2017	1778	1848	1886	1880	3241	1934	1791	1871	1957	1863	1920	1879	1815	1860	2075	1792	1756	1743	1933	1747	1843	1744	1778	1882	1887	1912	2043	1934
CC027_VC2950_mini	1969	1804	1790	1794	1971	1980	1888	1949	1778	1804	1884	1850	1852	1848	2055	1863	1951	1938	1913	1814	1996	1742	1834	1864	1851	3263	1914	1785	1853	1937	1841	1893	1853	1804	1838	2049	1775	1735	1713	1891	1725	1817	1736	1755	1861	1856	1888	2019	1915
CC028_BW2377_mini	2081	1809	1847	1814	1844	1789	1885	1909	1760	1801	1864	2019	1858	1864	2062	1884	1932	1862	1837	1905	1871	1869	2010	2003	1995	1894	3308	2001	1865	1771	1860	1903	1855	1864	1795	1977	1927	1909	1695	1950	1876	1898	1794	1952	1879	1849	1940	1927	2028
CC028_CE5684_mini	2092	1806	1854	1824	1867	1810	1908	1932	1767	1806	1887	2042	1881	1887	2086	1885	1946	1878	1834	1929	1894	1866	2034	2014	2017	1918	3332	2025	1889	1778	1884	1927	1879	1870	1819	2001	1951	1920	1712	1972	1891	1922	1801	1976	1903	1856	1964	1950	2052
CC028_TJ9843_mini	2092	1806	1854	1824	1867	1810	1908	1932	1767	1806	1887	2042	1881	1887	2086	1885	1946	1878	1834	1929	1894	1866	2034	2014	2017	1918	3332	2025	1889	1778	1884	1927	1879	1870	1819	2001	1951	1920	1712	1972	1891	1922	1801	1976	1903	1856	1964	1950	2052
CC029_KR9114_mini	1974	1893	1769	1702	1795	1843	1898	1776	1795	1794	1884	2004	1952	1800	2024	1887	1795	1969	1805	1921	1875	1707	1948	2031	1949	1805	2025	3259	1949	1836	1873	1796	1906	1869	1918	1908	1858	1927	1747	1931	1924	1924	1745	1825	2004	1801	1835	1860	2172
CC029_VW3320_mini	1974	1889	1762	1702	1791	1841	1901	1775	1802	1799	1889	2006	1950	1797	2024	1883	1795	1976	1802	1923	1871	1700	1946	2028	1951	1812	2028	3272	1943	1837	1874	1796	1903	1864	1921	1912	1858	1928	1747	1931	1927	1924	1743	1825	2003	1796	1837	1854	2177
CC029_YT9835_mini	1969	1881	1760	1697	1789	1843	1908	1780	1798	1788	1879	2000	1945	1798	2026	1878	1787	1969	1805	1912	1870	1703	1949	2035	1948	1804	2027	3271	1945	1837	1874	1796	1896	1860	1914	1908	1859	1915	1740	1925	1920	1930	1751	1822	1998	1805	1834	1852	2170
CC030_BK3409_mini	1723	1985	1981	1638	1709	1687	1794	1821	1792	1773	1724	1895	1947	1990	1885	1901	1755	1756	1736	1945	1973	1713	1848	1827	1704	1848	1884	1919	3321	1911	1931	1839	1866	1743	1746	1989	1928	1914	1796	1793	1820	1822	1860	1812	1946	1871	1718	1821	1951
CC030_FY3970_mini	1723	1981	1976	1642	1710	1691	1794	1820	1789	1776	1726	1898	1948	1984	1885	1912	1756	1753	1739	1946	1977	1723	1844	1830	1709	1850	1881	1922	3308	1911	1934	1836	1865	1739	1755	1989	1932	1910	1801	1797	1822	1823	1862	1811	1954	1871	1715	1815	1956
CC030_WQ9820_mini	1723	1985	1981	1642	1711	1690	1791	1823	1795	1777	1726	1898	1949	1989	1888	1908	1757	1758	1741	1945	1975	1721	1846	1830	1705	1852	1883	1924	3314	1912	1936	1840	1867	1742	1752	1992	1929	1914	1797	1794	1822	1824	1859	1813	1950	1873	1720	1819	1955
CC031_CQ6315_mini	1871	2019	1765	1693	1850	1926	1795	1831	1812	1985	1819	1882	1926	1883	2036	1816	1944	1850	1976	1939	1908	1808	1919	1974	1864	1950	1798	1836	1919	3265	1845	1751	1922	1855	1832	1979	1917	1925	1814	1986	1891	1900	1862	1825	1839	1868	1928	1891	1999
CC031_HW5855_mini	1880	2031	1754	1706	1842	1943	1778	1811	1791	1961	1825	1869	1900	1886	2009	1820	1919	1823	1970	1932	1906	1812	1913	1946	1868	1948	1797	1840	1931	3259	1842	1742	1892	1876	1837	1959	1902	1944	1812	1991	1859	1901	1864	1808	1840	1868	1924	1892	2000
CC031_HZ3449_mini	1862	2020	1752	1686	1833	1910	1776	1806	1801	1958	1808	1867	1891	1873	2009	1807	1917	1824	1946	1920	1881	1798	1900	1952	1859	1936	1784	1823	1924	3312	1830	1725	1885	1858	1825	1956	1906	1908	1801	1981	1864	1888	1859	1812	1845	1865	1902	1885	1997
CC032_PH2785_mini	1821	1877	1804	1781	1793	1842	1865	1819	1728	1872	1901	1895	1831	1756	1852	1874	1636	1924	1886	1938	1877	1756	1970	1836	1945	1840	1883	1845	1933	1831	3312	1814	1919	1871	1895	1870	1926	1809	1926	1781	1791	1860	1773	1827	1809	1831	1809	1915	1916
CC032_UB5340_mini	1824	1876	1806	1789	1793	1847	1868	1822	1730	1865	1901	1902	1835	1759	1860	1876	1638	1930	1883	1939	1879	1750	1972	1837	1954	1841	1883	1848	1933	1836	3301	1823	1918	1882	1901	1867	1930	1804	1941	1786	1791	1867	1772	1818	1816	1833	1818	1919	1919
CC032_YP7037_mini	1818	1863	1792	1778	1782	1836	1863	1807	1722	1860	1894	1889	1818	1739	1842	1859	1624	1909	1876	1929	1871	1745	1963	1821	1933	1829	1877	1840	1918	1824	3320	1811	1917	1857	1893	1864	1917	1819	1926	1769	1774	1849	1761	1818	1805	1824	1801	1899	1911
CC033_EQ3359_mini	1874	1793	1802	1620	1817	1790	1782	1819	1718	1748	1820	1834	1992	1933	2121	1687	1768	1899	1801	1816	1845	1889	1966	1839	1861	1887	1922	1763	1849	1718	1812	3277	1962	1957	1729	1934	1843	1923	1711	1939	1786	1790	1868	1785	1825	1837	1793	1842	1822
CC033_LJ3369_mini	1890	1807	1790	1619	1819	1777	1786	1816	1729	1763	1828	1823	1972	1930	2098	1699	1763	1888	1799	1815	1839	1876	1961	1817	1850	1899	1898	1748	1830	1731	1813	3264	1968	1962	1734	1931	1850	1908	1720	1942	1770	1788	1851	1789	1823	1827	1794	1839	1821
CC033_VU6917_mini	1882	1791	1785	1610	1809	1779	1777	1805	1711	1749	1818	1820	1969	1917	2092	1692	1746	1886	1789	1810	1834	1871	1954	1820	1851	1888	1907	1745	1834	1717	1804	3309	1970	1955	1725	1922	1838	1910	1708	1924	1780	1783	1854	1780	1819	1820	1781	1831	1812
CC035_BV9824_mini	1905	1801	1821	1641	1883	1750	1713	1796	1782	1806	1858	1847	1953	1831	2040	1824	1894	1873	1945	1809	1807	1821	1853	1974	1849	1810	1892	1840	1758	1868	1898	2002	1858	3258	1771	1893	1789	1879	1748	1831	1792	1903	1862	1806	1823	1997	1763	1907	1822
CC035_CI4995_mini	1906	1794	1813	1629	1888	1737	1715	1792	1784	1809	1860	1853	1964	1829	2045	1835	1897	1882	1934	1814	1798	1819	1853	1982	1851	1805	1896	1845	1768	1873	1890	2012	1841	3270	1769	1901	1786	1889	1745	1829	1799	1897	1866	1808	1851	1990	1759	1911	1829
CC035_KT6184_mini	1895	1794	1809	1630	1879	1733	1706	1786	1773	1800	1855	1844	1956	1819	2038	1830	1889	1873	1932	1805	1794	1812	1847	1974	1849	1797	1889	1838	1753	1865	1887	1999	1837	3270	1764	1889	1780	1880	1737	1827	1789	1893	1860	1797	1836	1985	1753	1903	1821
CC036_CE3447_mini	1780	1812	1770	1781	1724	1808	1957	1856	1841	1817	1970	1779	1790	1761	1902	1770	1777	1898	1841	1799	1903	1886	1983	1925	2053	1884	1858	1930	1795	1847	1932	1773	1838	1812	3225	1747	1792	1725	1760	1823	1796	1893	1687	1892	1822	1824	1868	1851	1989
CC036_QP1984_mini	1807	1823	1772	1805	1720	1809	1959	1876	1870	1822	1992	1780	1807	1783	1914	1791	1790	1915	1845	1822	1921	1891	2006	1933	2068	1901	1864	1937	1798	1865	1939	1797	1860	1834	3203	1764	1791	1744	1750	1821	1817	1904	1688	1913	1824	1834	1876	1858	2002
CC036_TR4934_mini	1797	1808	1765	1804	1709	1807	1947	1856	1855	1820	1984	1771	1805	1774	1907	1775	1787	1911	1828	1803	1915	1876	1995	1927	2062	1892	1863	1924	1788	1859	1926	1785	1852	1820	3215	1757	1786	1739	1751	1819	1798	1887	1682	1907	1820	1815	1866	1842	1997
CC037_BL5359_mini	1912	1800	1872	1818	1929	1971	1736	1845	1783	1999	1779	1945	1998	1885	1963	1850	1922	1848	1945	1918	1906	1806	1942	1919	1932	2043	1987	1866	1992	1942	1869	1933	2042	1874	1709	3333	1863	1930	1837	1914	1841	1840	1861	1856	1966	1862	2012	1930	2038
CC037_CD3289_mini	1912	1800	1872	1818	1929	1971	1736	1845	1783	1999	1779	1945	1998	1885	1963	1850	1922	1848	1945	1918	1906	1806	1942	1919	1932	2043	1987	1866	1992	1942	1869	1933	2042	1874	1709	3333	1863	1930	1837	1914	1841	1840	1861	1856	1966	1862	2012	1930	2038
CC037_YS7161_mini	1911	1799	1872	1818	1928	1970	1735	1844	1782	1999	1778	1944	1997	1885	1962	1849	1921	1847	1945	1917	1906	1807	1942	1919	1931	2042	1987	1866	1991	1941	1868	1934	2041	1873	1708	3334	1862	1929	1836	1913	1841	1839	1860	1855	1965	1861	2012	1929	2037
CC038_NX2341_mini	1733	1817	1915	1719	1841	1848	1855	1924	1908	1791	1931	1879	1870	1693	1888	1724	1838	1836	1908	1869	1959	1863	1879	1931	1839	1792	1956	1836	1943	1910	1926	1859	1922	1786	1771	1874	3314	1776	1867	1935	1809	1877	1821	1699	1891	1831	1846	1809	1894
CC038_VG0495_mini	1743	1820	1918	1724	1839	1859	1856	1928	1906	1802	1929	1881	1877	1689	1886	1730	1834	1829	1908	1872	1960	1873	1888	1937	1838	1793	1966	1839	1942	1912	1929	1860	1922	1797	1771	1878	3303	1772	1875	1934	1812	1894	1819	1703	1894	1821	1851	1814	1893
CC038_VL5502_mini	1724	1804	1903	1717	1832	1838	1857	1919	1903	1786	1922	1872	1862	1682	1878	1722	1831	1824	1900	1862	1947	1853	1872	1924	1837	1786	1947	1831	1939	1898	1925	1854	1910	1780	1776	1866	3317	1769	1859	1927	1798	1872	1814	1690	1885	1820	1841	1802	1882
CC039_CA1357_mini	1810	1915	1733	1755	1762	1810	1847	1650	1836	1834	1806	1817	1828	1734	2084	1815	1719	1717	1751	1872	1870	1798	1968	1965	1974	1743	1920	1899	1940	1905	1818	1971	1859	1879	1701	1950	1778	3242	1721	1902	1834	1704	1742	1833	2004	1774	1951	1919	1878
CC039_TL7669_mini	1796	1925	1736	1753	1765	1819	1852	1643	1833	1853	1793	1834	1818	1735	2089	1824	1739	1738	1760	1874	1887	1811	1980	1980	1963	1740	1928	1880	1942	1913	1831	1954	1868	1899	1712	1954	1793	3260	1735	1911	1843	1713	1744	1852	2012	1795	1940	1940	1881
CC039_VC5970_mini	1798	1946	1752	1752	1766	1807	1849	1648	1831	1856	1793	1835	1834	1754	2098	1828	1739	1732	1765	1883	1884	1820	1992	1997	1972	1745	1936	1884	1955	1925	1824	1959	1868	1915	1719	1959	1801	3222	1753	1920	1846	1720	1752	1874	2012	1812	1946	1961	1891
CC040_LJ3646_mini	1793	1828	1918	1713	1815	1812	1942	1866	1797	1764	1845	1754	1988	1769	1737	1727	1873	1936	1833	1768	1764	1912	1855	1831	1873	1745	1728	1704	1815	1794	1938	1725	1787	1731	1797	1875	1869	1732	3153	2028	1777	1797	1778	1769	1858	1664	1820	1947	1894
CC040_XV6530_mini	1769	1837	1885	1681	1833	1803	1915	1832	1782	1766	1800	1745	1959	1791	1774	1737	1830	1879	1883	1777	1801	1938	1844	1846	1846	1753	1741	1687	1820	1821	1900	1757	1816	1744	1733	1895	1891	1755	3185	2041	1790	1792	1821	1771	1856	1666	1854	1946	1889
CC040_ZH8146_mini	1802	1844	1906	1708	1825	1826	1932	1867	1792	1772	1828	1755	1991	1808	1764	1748	1863	1908	1854	1790	1792	1936	1859	1848	1844	1760	1740	1688	1817	1803	1914	1746	1816	1739	1755	1902	1883	1753	3168	2038	1806	1802	1805	1780	1859	1685	1839	1950	1895
CC041_HS7645_mini	1953	1962	1842	1775	1915	1890	1778	1855	1740	1878	1917	1963	2039	1899	2013	1768	1980	1851	1917	1957	1879	1896	1928	1968	1891	1892	1970	1899	1793	1976	1775	1933	1939	1818	1792	1911	1920	1887	2009	3313	1840	1937	1899	1753	2081	1839	2027	1868	1991
CC041_JX4863_mini	1962	1969	1845	1774	1920	1892	1792	1861	1751	1884	1919	1968	2050	1908	2017	1775	1992	1851	1924	1969	1883	1901	1933	1978	1890	1892	1972	1898	1799	1983	1775	1936	1943	1820	1807	1915	1923	1896	2017	3303	1848	1940	1904	1763	2086	1842	2041	1877	1995
CC041_XR8552_mini	1955	1959	1844	1774	1914	1888	1781	1852	1742	1876	1922	1965	2038	1907	2012	1770	1986	1851	1916	1961	1882	1900	1926	1975	1886	1883	1969	1893	1793	1976	1773	1932	1937	1817	1798	1914	1919	1887	2008	3305	1842	1934	1901	1759	2079	1841	2035	1869	1987
CC042_AQ7914_mini	1893	1853	2065	1717	1688	1795	1831	1959	1875	1840	1939	1839	2027	1918	2064	1917	1920	1844	1943	1969	1950	1941	1866	1933	1934	1756	1921	1938	1856	1892	1807	1811	1881	1804	1801	1887	1833	1862	1757	1880	3275	1950	1783	1794	1744	2013	1915	1850	1936
CC042_JC8867_mini	1877	1839	2059	1706	1675	1784	1835	1951	1861	1829	1927	1827	2011	1920	2051	1903	1913	1838	1933	1956	1941	1945	1857	1920	1926	1743	1911	1925	1849	1879	1801	1805	1870	1795	1796	1880	1820	1853	1761	1867	3257	1942	1770	1781	1736	2003	1903	1846	1918
CC042_PV3891_mini	1878	1841	2057	1702	1673	1782	1829	1948	1860	1828	1927	1825	2009	1920	2050	1904	1911	1835	1931	1956	1938	1940	1854	1920	1923	1741	1908	1925	1847	1877	1798	1803	1868	1793	1793	1877	1818	1854	1755	1866	3256	1939	1769	1780	1733	2002	1903	1844	1919
CC043_HY3899_mini	1853	1859	1756	1728	1826	1785	1910	1814	1858	1848	1872	1844	1924	1778	1846	1833	1896	1868	1883	1909	1848	1749	1831	1913	1863	1829	1905	1901	1832	1881	1852	1805	1962	1878	1854	1855	1879	1688	1779	1930	1912	3294	1826	1792	1878	1883	1736	1847	1830
CC043_OZ0096_mini	1870	1861	1776	1724	1830	1783	1926	1839	1877	1846	1906	1860	1938	1780	1869	1821	1909	1872	1898	1929	1849	1754	1849	1918	1876	1832	1922	1903	1841	1875	1861	1823	1964	1897	1878	1852	1886	1705	1783	1950	1947	3289	1834	1795	1898	1891	1744	1872	1846
CC043_VJ0336_mini	1890	1878	1777	1743	1847	1801	1925	1842	1874	1864	1894	1877	1927	1794	1855	1846	1925	1883	1901	1917	1868	1785	1856	1936	1891	1851	1941	1920	1842	1902	1862	1810	1982	1891	1879	1870	1888	1701	1784	1951	1934	3303	1836	1817	1899	1908	1765	1877	1855
CC044_EN8502_mini	1772	1803	1739	1604	1723	1799	1642	1654	1887	1744	1720	1711	1744	1744	1840	1719	1637	1648	1762	1879	1913	1627	1824	1833	1727	1761	1792	1748	1849	1849	1772	1870	1879	1833	1661	1864	1800	1717	1734	1894	1748	1817	3229	1602	1807	1822	1679	1828	1850
CC044_OZ0100_mini	1760	1808	1736	1591	1722	1806	1630	1655	1900	1749	1717	1704	1737	1732	1835	1734	1636	1669	1761	1888	1942	1641	1829	1822	1727	1760	1776	1735	1865	1854	1788	1874	1890	1847	1663	1871	1805	1747	1745	1886	1760	1802	3222	1585	1795	1825	1684	1821	1857
CC044_RJ6386_mini	1776	1817	1755	1606	1736	1810	1642	1663	1916	1760	1719	1717	1747	1743	1838	1750	1653	1673	1770	1901	1946	1647	1846	1840	1743	1767	1794	1753	1866	1871	1801	1877	1904	1872	1672	1892	1826	1755	1759	1898	1773	1820	3230	1592	1810	1847	1697	1833	1873
CC045_FQ3196_mini	1877	1809	1668	1594	1797	1653	1756	1701	1694	1728	1745	1813	1816	1807	1923	1831	1841	1819	1784	1868	1797	1880	1956	1831	1784	1717	1970	1752	1830	1818	1828	1754	1771	1761	1813	1865	1691	1833	1761	1754	1766	1781	1594	3113	1685	1747	1861	1782	1978
CC045_OZ0104_mini	1920	1840	1673	1613	1798	1678	1757	1722	1710	1743	1756	1816	1847	1842	1933	1829	1879	1837	1808	1875	1805	1901	1973	1873	1805	1736	2007	1775	1838	1828	1851	1775	1815	1777	1851	1888	1724	1845	1754	1748	1784	1784	1622	3134	1688	1757	1877	1809	1990
CC045_YP6940_mini	1916	1880	1720	1656	1826	1700	1779	1737	1743	1778	1806	1827	1890	1859	1966	1822	1898	1881	1830	1892	1834	1911	2008	1874	1838	1762	2013	1823	1891	1859	1870	1822	1846	1818	1912	1945	1753	1858	1788	1782	1789	1778	1652	3105	1724	1792	1918	1837	2029
CC046_GX1505_mini	1894	1802	1841	1722	1890	1741	1860	1817	1807	1780	1857	1935	1892	1788	1964	1754	1819	1752	1759	2041	1936	1860	1829	1909	1944	1849	1913	1955	1944	1797	1825	1810	1784	1805	1790	1980	1868	1978	1858	2072	1711	1906	1799	1717	3257	1835	1831	1936	1860
CC046_PM9711_mini	1868	1783	1823	1708	1883	1727	1824	1789	1792	1776	1823	1908	1864	1768	1932	1741	1812	1723	1737	2026	1948	1834	1802	1896	1898	1855	1861	1932	1935	1801	1788	1797	1775	1796	1772	1959	1841	1949	1830	2060	1701	1889	1787	1700	3230	1847	1798	1907	1830
CC046_ZW0077_mini	1907	1804	1842	1717	1910	1760	1860	1819	1813	1797	1851	1940	1893	1792	1970	1777	1833	1753	1771	2032	1961	1860	1833	1924	1933	1888	1892	1975	1942	1815	1814	1828	1798	1825	1789	1986	1874	1981	1848	2080	1719	1911	1794	1725	3245	1856	1832	1926	1849
CC047_DG2365_mini	1764	1917	2123	1689	1650	1832	1805	1898	1852	1795	1764	1803	1655	1818	1909	1858	1824	1752	1945	1879	1948	2096	1929	1859	1900	1841	1840	1766	1865	1869	1821	1827	1743	1953	1783	1851	1798	1756	1607	1834	1966	1866	1820	1721	1835	3308	1700	1827	1959
CC047_OZ0117_mini	1768	1920	2126	1693	1654	1837	1809	1900	1857	1798	1766	1806	1660	1821	1910	1861	1831	1758	1952	1879	1950	2100	1930	1859	1903	1847	1841	1771	1870	1870	1822	1828	1744	1954	1784	1856	1798	1759	1608	1837	1968	1869	1824	1724	1838	3311	1700	1829	1960
CC047_VY6782_mini	1755	1906	2111	1674	1654	1816	1799	1885	1855	1788	1742	1793	1648	1813	1896	1850	1828	1737	1946	1875	1936	2086	1911	1847	1888	1837	1827	1752	1850	1850	1804	1820	1742	1955	1790	1843	1791	1750	1603	1831	1953	1866	1816	1720	1825	3310	1694	1818	1947
CC049_EQ1564_mini	1804	1919	1858	1801	1755	1925	1846	1888	1785	1871	1871	1878	1966	1916	2011	1710	1892	1896	1964	1957	1918	1940	1902	1842	2093	1933	1996	1854	1749	1922	1837	1843	1910	1805	1871	2061	1899	1949	1824	2062	1908	1777	1736	1859	1867	1752	3203	1959	1954
CC049_TE0130_mini	1793	1900	1842	1787	1749	1895	1828	1873	1764	1848	1846	1871	1948	1898	2003	1692	1886	1893	1938	1955	1905	1937	1882	1830	2064	1904	1974	1846	1753	1920	1832	1823	1889	1786	1841	2048	1886	1951	1821	2045	1896	1765	1724	1857	1873	1732	3191	1963	1943
CC049_ZE9056_mini	1790	1883	1827	1757	1736	1882	1815	1867	1759	1845	1813	1859	1921	1878	1981	1678	1877	1889	1917	1945	1895	1928	1882	1823	2038	1885	1970	1827	1738	1909	1817	1799	1873	1769	1812	2028	1864	1921	1819	2053	1869	1758	1712	1849	1848	1723	3213	1953	1916
CC050_LK2279_mini	1934	1802	1846	1691	1840	1766	1921	1930	1813	1800	1838	1859	1751	1902	1863	1903	1857	1957	1858	1802	1841	1838	1967	1987	1877	2029	1953	1824	1830	1879	1908	1856	1878	1904	1798	1938	1804	1919	1907	1875	1825	1867	1834	1810	1934	1834	1931	3324	2025
CC050_ZJ8107_mini	1931	1800	1843	1687	1838	1763	1916	1925	1811	1796	1838	1857	1748	1899	1859	1899	1855	1952	1856	1799	1838	1836	1966	1986	1873	2024	1950	1824	1827	1877	1904	1853	1876	1898	1797	1936	1802	1914	1904	1872	1822	1865	1834	1806	1932	1830	1929	3326	2023
CC050_ZY6426_mini	1930	1799	1842	1687	1834	1763	1913	1923	1808	1796	1839	1854	1749	1899	1857	1896	1854	1952	1853	1799	1835	1835	1965	1983	1869	2021	1948	1824	1826	1876	1904	1850	1878	1896	1795	1934	1800	1914	1905	1871	1819	1863	1833	1804	1930	1831	1929	3328	2021
CC051_EC2451_mini	2065	1925	1885	1749	1861	1973	1869	1790	1902	1967	1912	1951	1945	1794	2045	1846	1863	2062	2013	1941	1972	1889	2132	1905	1909	1918	2055	2139	1953	1991	1915	1818	1982	1808	1957	2045	1884	1887	1868	2000	1903	1842	1863	1957	1859	1972	1904	2018	3312
CC051_GD8691_mini	2055	1922	1884	1747	1861	1975	1870	1784	1892	1965	1904	1946	1941	1789	2041	1839	1859	2054	2013	1941	1966	1885	2132	1901	1908	1917	2049	2136	1948	1986	1916	1819	1978	1805	1952	2043	1878	1882	1868	1994	1897	1838	1858	1952	1859	1967	1905	2013	3320
CC051_GK2288_mini	2061	1925	1879	1748	1855	1977	1865	1785	1894	1961	1908	1940	1946	1790	2040	1841	1860	2057	2008	1938	1963	1881	2130	1904	1905	1914	2050	2142	1946	1985	1910	1819	1979	1802	1954	2040	1876	1876	1864	1995	1896	1839	1862	1955	1857	1968	1907	2016	3320
CC052_CE2991_mini	1898	1840	1826	1589	1690	1754	1911	1823	1856	1893	1681	1888	1767	1666	1874	1928	1979	1886	1908	1895	1829	1949	1961	1815	1766	1813	1925	1778	1768	1882	1862	1798	1746	1806	1577	1870	1908	1869	1854	1958	1899	1712	1828	1826	1809	1959	1945	1839	2079
CC052_OZ0145_mini	1861	1815	1786	1540	1633	1729	1877	1782	1802	1832	1644	1838	1711	1613	1828	1889	1927	1848	1853	1854	1774	1914	1936	1777	1729	1769	1881	1751	1728	1823	1831	1786	1742	1771	1577	1848	1862	1858	1822	1921	1849	1680	1808	1783	1767	1913	1910	1830	2013
CC052_XK9091_mini	1881	1826	1810	1572	1661	1737	1887	1809	1824	1860	1650	1860	1736	1643	1854	1917	1953	1875	1872	1878	1797	1920	1963	1800	1746	1799	1909	1753	1754	1857	1847	1798	1745	1800	1591	1870	1883	1852	1828	1919	1868	1683	1821	1812	1792	1928	1921	1845	2038
CC053_AN5063_mini	1953	1754	1815	1684	1816	1791	1777	1782	1736	1837	1846	1936	1951	1819	1958	1948	1909	1825	1793	1977	1888	1624	1867	1968	1855	1866	2004	1943	1834	1798	1853	1797	1812	1845	1800	1943	1745	1795	1715	1852	1932	1979	1786	1850	1898	1746	1797	1908	1875
CC053_AY2352_mini	1952	1751	1832	1688	1838	1797	1784	1798	1747	1841	1857	1946	1987	1837	1979	1952	1898	1841	1800	1982	1922	1621	1879	1988	1864	1887	2012	1957	1859	1807	1881	1797	1812	1863	1820	1964	1741	1815	1714	1856	1938	1981	1812	1859	1911	1759	1816	1928	1893
CC053_OZ0414_mini	1932	1727	1806	1673	1805	1778	1760	1778	1727	1830	1839	1920	1942	1813	1956	1927	1881	1810	1781	1965	1890	1598	1864	1954	1836	1853	2005	1940	1834	1780	1856	1771	1784	1838	1793	1943	1727	1796	1686	1827	1920	1964	1775	1839	1892	1738	1800	1897	1868
CC055_HQ6297_mini	1974	1832	1746	1738	1806	1910	1846	1819	1781	1868	1809	1827	1865	1935	2036	1765	1817	2068	1827	1880	1824	1762	2059	2070	2010	1866	2039	2002	1840	1929	1860	1998	2009	1963	1910	1925	1843	1866	1673	1873	1847	1894	1895	1810	1865	1760	1951	1970	1891
CC055_SF2238_mini	1981	1834	1755	1735	1797	1906	1848	1825	1782	1873	1813	1833	1876	1931	2035	1762	1830	2068	1836	1888	1818	1760	2060	2063	2006	1869	2033	2014	1837	1926	1856	1996	2010	1974	1916	1927	1851	1861	1681	1863	1854	1908	1894	1818	1870	1760	1958	1957	1888
CC055_UL6373_mini	1980	1841	1754	1753	1806	1914	1856	1820	1784	1878	1813	1835	1868	1946	2041	1785	1801	2075	1824	1881	1823	1764	2066	2044	2027	1890	2036	1990	1852	1916	1883	1997	2014	1962	1927	1927	1857	1860	1681	1873	1849	1878	1898	1816	1846	1764	1966	1961	1892
CC056_DG2374_mini	1924	1991	1705	1780	1782	1854	1782	1790	1767	1923	1767	1856	1868	1785	1922	1802	1981	1895	1825	1919	1981	1801	1858	1901	1842	1949	1947	1936	1835	2011	1887	1861	1981	1852	1814	1971	1850	1802	1839	1993	1802	1869	1791	1834	1924	1852	1855	1847	2101
CC056_OZ0158_mini	1922	1989	1701	1775	1780	1849	1780	1787	1764	1922	1763	1855	1866	1782	1920	1801	1977	1893	1822	1917	1981	1800	1853	1899	1834	1949	1940	1932	1832	2009	1886	1861	1977	1846	1806	1964	1848	1797	1839	1990	1800	1867	1786	1831	1919	1849	1850	1841	2098
CC056_XE6073_mini	1923	1990	1702	1782	1783	1856	1783	1789	1764	1924	1766	1855	1869	1786	1921	1803	1980	1898	1824	1918	1984	1800	1855	1900	1840	1952	1947	1935	1832	2010	1888	1864	1981	1852	1812	1973	1851	1802	1840	1990	1801	1868	1791	1833	1920	1851	1855	1846	2098
CC057_BF6631_mini	1971	1863	1819	1749	1973	1756	1929	1820	1753	1839	1996	1854	1875	1797	1925	1845	1785	1846	1798	1902	1909	1877	1942	1943	1944	1826	2014	1877	1864	1825	1911	1964	2057	1858	1829	1901	1907	1868	1841	1894	2038	1898	1738	1906	1902	1823	1805	1931	2055
CC057_IJ7606_mini	1939	1847	1793	1730	1941	1720	1897	1799	1721	1823	1971	1833	1847	1772	1892	1821	1753	1810	1769	1878	1887	1843	1907	1909	1917	1803	1989	1843	1846	1788	1873	1944	2023	1834	1801	1873	1887	1845	1823	1857	2004	1877	1710	1883	1869	1789	1777	1893	2025
CC057_NC2180_mini	1963	1864	1821	1746	1953	1750	1916	1824	1742	1843	1992	1857	1867	1802	1924	1845	1770	1845	1806	1898	1906	1873	1930	1942	1940	1832	2005	1869	1880	1815	1896	1963	2056	1864	1811	1895	1907	1850	1836	1884	2038	1900	1731	1899	1895	1816	1788	1929	2060
CC058_GI9243_mini	2003	1882	1644	1737	1808	1838	1835	1740	1846	1779	1864	1878	1751	1839	1915	1922	1881	1945	1766	1869	1899	1809	1838	1799	1797	1961	1831	1715	1803	2006	1726	1710	1746	1755	1717	1874	1836	1854	1692	1725	1787	1722	1720	1777	1771	1813	1916	1947	1954
CC058_OZ0164_mini	1984	1866	1615	1696	1780	1833	1818	1709	1827	1775	1832	1843	1737	1821	1900	1907	1855	1941	1737	1830	1887	1781	1819	1770	1781	1939	1798	1698	1789	1977	1711	1683	1716	1744	1678	1838	1814	1832	1672	1678	1777	1709	1696	1770	1738	1797	1885	1909	1930
CC058_XP8870_mini	1993	1870	1619	1706	1784	1832	1828	1714	1839	1766	1835	1845	1730	1823	1909	1905	1862	1948	1743	1836	1890	1782	1827	1782	1784	1948	1805	1703	1789	1983	1709	1690	1722	1748	1684	1849	1819	1840	1676	1692	1774	1712	1704	1773	1755	1805	1891	1921	1943
CC059_AU1726_mini	2004	1867	1877	1755	1909	1963	1867	1839	1857	1915	1893	1974	1947	1810	1997	1781	1877	1977	2013	1922	1959	1861	2037	1915	1842	1999	1965	2111	1938	1985	1830	1866	1964	1716	1968	2051	1869	1795	1758	2043	1968	1884	1829	1971	1859	1966	1847	1938	2947
CC059_JU6153_mini	2035	1897	1886	1768	1926	1996	1861	1834	1835	1900	1923	1981	1963	1842	2000	1798	1844	1979	2032	1944	1956	1888	2048	1910	1871	1988	2000	2110	1963	1993	1872	1891	1943	1740	1953	2062	1871	1821	1789	2039	1950	1885	1831	1986	1883	1963	1877	1949	2977
CC059_LW3718_mini	2015	1881	1866	1764	1901	1971	1850	1823	1844	1901	1900	1956	1939	1820	1985	1777	1862	1963	2019	1945	1959	1872	2042	1897	1857	1996	1986	2102	1944	1983	1855	1867	1951	1725	1971	2047	1852	1805	1780	2049	1955	1891	1855	1969	1871	1966	1855	1954	2971
CC060_EJ5738_mini	1786	1859	1860	1860	1830	1944	1912	1846	1817	1887	1802	1804	1853	1792	1870	1800	1936	1901	2010	1744	1955	1853	1893	1892	2105	1941	1804	1788	1690	1945	1932	1749	1950	1904	1913	1887	1902	1781	1801	1948	1960	1924	1710	1776	1749	1832	1907	1940	2001
CC060_KU0301_mini	1791	1866	1866	1855	1813	1955	1894	1860	1813	1871	1806	1800	1842	1816	1863	1810	1939	1917	2029	1739	1943	1855	1909	1898	2109	1956	1798	1795	1690	1950	1927	1732	1974	1906	1931	1867	1905	1779	1802	1954	1951	1907	1715	1762	1751	1841	1921	1945	1981
CC060_MD5063_mini	1772	1856	1840	1837	1803	1953	1871	1829	1793	1863	1794	1772	1832	1798	1852	1799	1907	1888	1998	1716	1923	1836	1869	1882	2072	1937	1778	1781	1680	1938	1910	1721	1949	1892	1905	1842	1885	1764	1793	1936	1937	1882	1717	1733	1731	1829	1896	1912	1959
CC061_II7149_mini	1891	1898	1837	1767	1792	1856	1812	1765	1835	1958	1735	1986	1952	1867	1981	1856	1864	1892	1843	2065	1892	1780	1994	1862	1840	2043	1965	1946	1987	1936	1792	1880	1884	1738	1873	2103	1740	1789	1705	1962	1873	1920	1757	1852	1958	1818	1920	1820	2039
CC061_KJ9818_mini	1897	1898	1844	1768	1797	1860	1812	1768	1839	1963	1738	1988	1955	1872	1986	1859	1868	1898	1849	2070	1895	1781	1993	1868	1841	2046	1968	1946	1987	1940	1796	1879	1884	1743	1873	2107	1744	1790	1708	1966	1878	1926	1759	1858	1963	1820	1924	1823	2045
CC061_OZ0180_mini	1892	1897	1840	1762	1793	1858	1811	1767	1834	1957	1736	1980	1947	1868	1985	1848	1870	1895	1839	2062	1892	1780	1987	1865	1837	2045	1961	1940	1981	1936	1786	1878	1881	1739	1876	2099	1745	1784	1703	1960	1873	1917	1749	1854	1957	1821	1919	1813	2043
CC062_FD3382_mini	1843	1885	1789	1795	1856	1803	1820	1892	1844	1792	1776	1925	1893	1901	1801	1836	1920	1843	1873	1996	1975	1736	1948	1879	1810	1791	1895	1816	1830	1910	1932	1808	1873	1861	1842	1854	1879	1784	1820	2028	1930	2020	1852	1731	1818	1824	1926	1934	1773
CC062_GM7452_mini	1847	1886	1779	1798	1836	1803	1813	1879	1829	1787	1768	1928	1884	1887	1781	1851	1898	1830	1847	2027	1980	1732	1931	1855	1791	1790	1889	1795	1841	1911	1930	1802	1884	1834	1824	1842	1871	1779	1819	2024	1920	1988	1893	1705	1829	1814	1932	1935	1772
CC062_HL2814_mini	1842	1885	1790	1803	1834	1801	1807	1887	1830	1784	1774	1915	1881	1877	1793	1842	1910	1820	1859	2008	1953	1734	1940	1870	1805	1812	1903	1819	1829	1908	1922	1810	1872	1837	1840	1851	1871	1776	1816	2027	1916	2013	1873	1716	1818	1809	1910	1928	1764
CC063_LH4696_mini	1901	1936	1858	1747	1851	1875	1824	1849	1711	1736	1879	1906	1834	1982	1961	1755	1849	1834	1784	1827	2049	1948	1921	1979	1859	1958	1927	1887	1968	1983	1912	2046	1929	1854	1833	1915	1917	1939	1776	1913	1773	1817	1781	1841	1973	1775	1927	1861	1851
CC063_PE9880_mini	1896	1924	1847	1734	1841	1865	1824	1841	1702	1722	1870	1899	1824	1972	1952	1741	1848	1817	1778	1819	2039	1937	1909	1976	1840	1943	1920	1884	1957	1979	1898	2041	1911	1839	1819	1904	1906	1931	1763	1898	1764	1808	1766	1827	1972	1765	1912	1850	1841
CC063_UR6532_mini	1889	1907	1835	1724	1829	1856	1819	1838	1687	1714	1861	1891	1817	1958	1944	1724	1843	1810	1775	1802	2020	1921	1887	1970	1828	1928	1912	1878	1941	1962	1890	2021	1899	1827	1809	1887	1889	1919	1746	1877	1757	1789	1754	1819	1954	1752	1901	1834	1832
CC065_IW4084_mini	2070	1790	1773	1821	1771	1851	1837	1929	1886	1929	1853	1820	1897	2046	1927	1848	1888	1966	1890	1980	1970	1785	2021	1886	1845	1847	1967	1879	1772	1901	1907	1895	1823	1843	1776	1930	1795	1816	1761	2060	1861	1855	1759	1755	1867	1945	1927	1915	2016
CC065_NH7331_mini	2073	1792	1790	1825	1771	1860	1834	1929	1902	1939	1853	1824	1901	2050	1925	1861	1888	1972	1909	1983	1974	1796	2023	1886	1843	1845	1976	1885	1781	1902	1915	1908	1824	1843	1777	1935	1798	1820	1767	2060	1867	1856	1774	1757	1870	1957	1932	1919	2022
CC065_SL9593_mini	2071	1793	1778	1825	1774	1856	1837	1930	1892	1934	1858	1823	1900	2047	1927	1854	1890	1969	1897	1983	1975	1790	2023	1888	1847	1851	1971	1880	1772	1903	1911	1901	1826	1847	1778	1933	1797	1820	1765	2063	1864	1859	1767	1756	1871	1950	1930	1918	2019
CC068_KC9305_mini	1983	1738	1685	1715	1901	1799	1823	1746	1804	1877	1800	2007	1965	1856	1943	1788	1831	1910	1926	1869	1948	1878	2029	1934	1746	1884	2019	1900	1808	1857	1905	1961	1915	1841	1813	2047	1872	1978	1863	2046	1804	1830	1806	1977	1980	1752	1963	1942	1953
CC068_TX2118_mini	1960	1717	1658	1692	1844	1761	1777	1699	1759	1838	1760	1958	1916	1806	1893	1753	1784	1846	1917	1805	1891	1851	1974	1906	1699	1839	1988	1851	1775	1827	1870	1902	1880	1793	1761	2013	1830	1938	1837	1996	1768	1790	1761	1933	1941	1717	1907	1895	1900
CC068_VC4040_mini	1961	1711	1663	1692	1872	1775	1774	1708	1775	1837	1756	1974	1923	1825	1893	1754	1789	1859	1911	1815	1905	1861	1977	1918	1704	1852	1985	1859	1780	1823	1873	1918	1883	1803	1774	2022	1838	1932	1838	2015	1770	1795	1770	1927	1943	1721	1919	1902	1911
CC070_FZ7619_mini	1779	1760	1912	1671	1708	1769	1812	1950	1817	1762	1956	1741	1756	1724	1968	1808	1776	1821	1875	1856	1788	1868	1889	1869	1931	1783	1945	1729	1648	1893	1850	1897	1854	1895	1831	1786	2008	1834	1857	1910	1885	1838	1815	1742	1927	1964	1845	1866	1860
CC070_HG0066_mini	1736	1700	1846	1623	1676	1694	1783	1888	1770	1734	1889	1716	1706	1680	1929	1794	1755	1789	1825	1820	1728	1815	1870	1831	1876	1770	1902	1707	1641	1837	1811	1882	1785	1877	1765	1750	1940	1789	1810	1875	1824	1792	1778	1684	1895	1920	1768	1821	1831
CC070_UZ3580_mini	1795	1781	1920	1690	1710	1775	1827	1946	1823	1772	1960	1754	1755	1724	1973	1814	1801	1834	1891	1879	1799	1884	1897	1884	1932	1806	1967	1738	1667	1911	1858	1895	1870	1890	1825	1797	2034	1828	1871	1936	1893	1837	1822	1749	1944	1984	1840	1869	1872
CC071_DJ2265_mini	1826	1660	1822	1707	1642	1656	1758	1763	1785	1702	1671	1693	1813	1728	1827	1698	1705	1997	1873	1817	1806	1862	1760	1822	1810	1775	1816	1821	1719	1802	1738	1802	1746	1854	1738	1693	1784	1718	1843	1780	1710	1847	1644	1728	1790	1729	1769	1891	1781
CC071_PJ5500_mini	1851	1675	1834	1711	1665	1676	1741	1785	1806	1720	1699	1720	1843	1754	1849	1731	1729	1996	1890	1842	1816	1899	1783	1836	1817	1773	1849	1818	1729	1830	1735	1807	1756	1846	1723	1709	1791	1734	1858	1789	1757	1855	1653	1736	1790	1735	1770	1905	1792
CC071_TA8969_mini	1877	1664	1823	1695	1653	1679	1767	1799	1817	1731	1690	1733	1844	1750	1844	1734	1720	1988	1869	1855	1824	1899	1764	1835	1793	1766	1832	1814	1724	1811	1734	1802	1757	1855	1711	1704	1790	1732	1847	1786	1755	1862	1671	1723	1780	1743	1750	1910	1780
CC072_KH9709_mini	2221	1922	1854	1761	1931	1857	1952	1996	1828	1887	2015	1967	1983	1915	2177	1866	1961	1923	1908	2036	1843	1862	1977	1937	1863	2002	2131	1964	1902	1915	1940	1931	1993	1897	1908	1985	1879	1793	1840	2022	1879	1950	1769	1993	2009	1879	1817	1964	2140
CC072_XL1204_mini	2221	1922	1855	1762	1932	1858	1952	1996	1828	1888	2016	1967	1984	1915	2178	1866	1961	1924	1908	2037	1844	1862	1978	1938	1863	2002	2132	1965	1903	1915	1941	1931	1993	1897	1908	1985	1880	1793	1840	2021	1879	1950	1770	1994	2009	1880	1817	1964	2141
CC072_XR6354_mini	2222	1923	1854	1761	1931	1857	1953	1997	1829	1887	2015	1968	1983	1916	2177	1867	1962	1923	1909	2036	1843	1863	1977	1937	1864	2003	2131	1964	1902	1916	1940	1932	1994	1898	1909	1986	1879	1794	1841	2021	1880	1951	1769	1993	2010	1879	1818	1965	2140
CC074_QZ8545_mini	1941	1829	1981	1767	1755	1851	1825	1928	1874	1933	1801	1984	1833	1893	1916	1805	1990	1882	1803	1987	1856	1860	1958	2018	1850	1919	2050	1874	1970	1862	2009	1810	1882	1924	1826	2045	1820	1864	1727	1869	1848	2010	1795	1841	1902	1927	1841	1923	1928
CC074_UN9539_mini	1931	1816	1962	1762	1743	1845	1802	1921	1896	1926	1797	1957	1825	1881	1904	1801	1974	1878	1800	1967	1844	1838	1956	2011	1841	1913	2043	1869	1951	1854	2004	1808	1875	1914	1829	2046	1814	1874	1704	1857	1836	1980	1800	1810	1890	1905	1825	1898	1911
CC074_ZT3687_mini	1931	1813	1955	1759	1743	1838	1806	1914	1873	1927	1789	1967	1815	1877	1898	1793	1969	1875	1793	1974	1841	1836	1948	2002	1833	1905	2034	1864	1954	1849	2000	1799	1873	1910	1822	2034	1809	1859	1720	1857	1825	1999	1786	1815	1884	1904	1823	1905	1911
CC076_CV9505_mini	1776	1799	1924	1790	1809	1731	1867	1788	1780	1757	1821	1839	1895	1722	1894	1885	1896	1951	1777	1846	1836	1871	1664	1795	1856	1781	1798	1790	1885	1741	1871	1706	1911	1844	1763	1913	1847	1804	1831	1916	1846	1843	1771	1730	1930	1732	1805	1811	1890
CC076_FP7608_mini	1746	1769	1900	1749	1781	1701	1837	1754	1744	1722	1793	1812	1861	1686	1854	1853	1861	1924	1743	1815	1801	1840	1628	1755	1810	1754	1765	1745	1859	1716	1838	1684	1884	1804	1733	1865	1814	1751	1795	1871	1811	1798	1746	1690	1904	1684	1769	1787	1855
CC076_OZ0423_mini	1766	1801	1941	1766	1807	1704	1873	1799	1789	1744	1807	1840	1877	1712	1879	1890	1891	1942	1766	1845	1848	1876	1654	1784	1845	1780	1805	1773	1899	1736	1861	1725	1909	1829	1755	1911	1850	1788	1816	1897	1825	1835	1768	1726	1940	1719	1799	1814	1880
CC078_DX4008_mini	1933	1953	1789	1818	1943	1831	1839	1873	1720	1903	2004	1870	1925	1939	1937	1835	1862	1857	1812	1861	1978	1872	1839	1993	2060	1918	1932	1878	1862	1917	2014	1939	1825	1900	1922	1958	1867	1887	1796	1983	1807	1888	1805	1885	1872	1832	1828	1976	1902
CC078_OZ0232_mini	1905	1941	1770	1803	1932	1809	1824	1862	1708	1900	1981	1852	1915	1928	1917	1828	1860	1847	1789	1850	1966	1857	1819	1975	2040	1906	1914	1860	1853	1917	2000	1922	1813	1882	1902	1951	1847	1869	1788	1962	1789	1862	1785	1875	1857	1820	1810	1965	1891
CC078_QI4986_mini	1928	1939	1768	1801	1930	1817	1820	1872	1708	1906	1991	1852	1920	1944	1921	1837	1870	1838	1804	1843	1968	1867	1820	1974	2037	1921	1921	1859	1867	1917	1994	1922	1812	1884	1908	1956	1849	1875	1791	1967	1793	1871	1790	1880	1854	1824	1813	1978	1896
CC079_OZ0238_mini	1932	1807	1945	1653	1789	1678	1661	1836	1830	1934	1762	1836	1787	1766	1855	1871	1764	1724	1806	2040	1904	1790	1905	1854	1734	1814	1830	1779	1936	1822	1904	1763	1736	1823	1696	1970	1858	1852	1820	1871	1838	1746	1988	1777	1908	2043	1616	1880	1935
CC079_QX7100_mini	1926	1779	1911	1626	1754	1649	1632	1810	1840	1889	1758	1786	1740	1722	1809	1836	1758	1727	1793	2011	1876	1748	1900	1840	1708	1809	1802	1752	1891	1794	1849	1717	1716	1787	1709	1943	1791	1821	1756	1819	1809	1717	1953	1757	1855	2027	1585	1848	1929
CC079_SL3567_mini	1920	1781	1924	1618	1773	1666	1645	1823	1828	1897	1772	1801	1751	1739	1830	1839	1770	1712	1813	2015	1863	1754	1893	1844	1713	1817	1808	1766	1920	1808	1863	1733	1720	1803	1688	1942	1818	1836	1786	1839	1826	1733	1983	1751	1878	2038	1599	1853	1919
CC080_HM8669_mini	1902	1867	1880	1691	1805	1867	1796	1810	1871	1927	1794	1838	2037	1933	2157	1746	1817	2019	1891	2001	1870	1861	1946	1986	1792	1880	1931	1799	1915	1986	1990	1912	1943	1901	1774	1959	1970	1894	1827	1885	1908	1939	1866	1743	1934	1866	1861	1937	1990
CC080_OZ0246_mini	1894	1835	1849	1680	1766	1864	1771	1772	1855	1941	1756	1838	1987	1922	2097	1727	1799	1991	1853	1977	1864	1844	1919	1987	1781	1862	1915	1807	1872	1972	1953	1868	1947	1860	1743	1943	1928	1865	1795	1855	1855	1931	1856	1718	1907	1846	1868	1922	1953
CC080_OZ0251_mini	1880	1828	1840	1686	1718	1901	1804	1753	1884	1983	1780	1803	1939	1977	2125	1680	1804	1948	1816	1990	1893	1810	1914	1949	1773	1851	1915	1829	1878	1953	1924	1828	1949	1862	1795	1939	1876	1872	1781	1860	1924	2024	1892	1699	1881	1865	1860	1893	1931
CC081_OZ0132_mini	1870	1865	1700	1778	1934	1850	1952	1790	1781	1881	1824	1999	1861	1732	1927	1882	1778	1938	1786	1994	1811	1791	1915	1871	1917	1810	1872	1883	1827	1966	1965	1737	1927	1835	1902	1968	1849	1810	1924	1954	1803	1932	1619	1883	1839	1730	1781	1884	1902
CC081_VL9914_mini	1843	1784	1609	1701	1865	1823	1923	1722	1717	1779	1750	1900	1805	1671	1822	1810	1745	1911	1691	1853	1733	1709	1809	1767	1816	1709	1789	1804	1749	1884	1886	1654	1853	1732	1859	1847	1770	1727	1858	1856	1756	1874	1534	1823	1752	1657	1706	1804	1830
CC081_XM2503_mini	1858	1777	1640	1630	1871	1817	1874	1697	1708	1765	1742	1886	1792	1675	1829	1843	1710	1924	1739	1842	1719	1700	1815	1790	1809	1738	1812	1819	1749	1887	1856	1695	1904	1716	1853	1878	1750	1695	1831	1885	1772	1902	1557	1808	1726	1653	1696	1799	1868
CC082_GD2392_mini	1879	1830	1728	1584	1697	1608	1611	1558	1702	1774	1613	1768	1742	1745	1926	1936	1844	1907	1769	1836	1837	1783	1930	1893	1792	1729	1946	1764	1809	1832	1681	1789	1805	1837	1712	1825	1669	1911	1637	1831	1898	1765	1779	1766	1806	1853	1804	1782	1828
CC082_NF7117_mini	1888	1845	1714	1597	1725	1644	1642	1592	1703	1751	1649	1792	1758	1768	1955	1938	1864	1919	1771	1848	1875	1786	1939	1921	1809	1764	1958	1777	1841	1825	1698	1791	1827	1833	1734	1845	1692	1900	1636	1861	1913	1787	1775	1789	1818	1833	1803	1799	1850
CC082_YG1341_mini	1887	1823	1687	1590	1707	1618	1616	1573	1678	1723	1635	1774	1767	1770	1932	1918	1870	1901	1751	1817	1839	1731	1946	1933	1815	1741	1943	1773	1799	1799	1712	1765	1818	1830	1733	1851	1694	1902	1643	1854	1907	1781	1726	1786	1794	1785	1800	1803	1848
CC083_QE6732_mini	1874	1698	1678	1655	1640	1698	1709	1757	1647	1714	1679	1900	1770	1688	1799	1765	1747	1763	1592	1863	1759	1751	1803	1874	1796	1729	1923	1894	1781	1764	1788	1680	1793	1790	1685	1946	1605	1790	1659	1835	1784	1709	1566	1743	1760	1724	1760	1685	1901
CC083_SN8644_mini	1808	1665	1601	1614	1613	1660	1658	1688	1584	1672	1607	1881	1753	1630	1774	1696	1728	1697	1528	1819	1706	1718	1724	1820	1753	1720	1859	1825	1728	1738	1719	1629	1775	1757	1576	1907	1567	1783	1591	1783	1729	1655	1558	1685	1711	1666	1729	1638	1827
CC083_WI2129_mini	1844	1685	1630	1619	1626	1661	1683	1697	1613	1686	1636	1867	1741	1646	1744	1714	1717	1726	1535	1818	1733	1736	1769	1833	1756	1701	1877	1858	1731	1716	1746	1646	1777	1782	1640	1879	1566	1775	1596	1778	1735	1677	1544	1732	1695	1671	1735	1651	1849
[truncated: 26 more columns]
